# Supplementary material
Source: HighWire-hosted journal article supplement (https://bmjopen.bmj.com/content/14/2/e080301)
Supplement: inline-supplementary-material-1 [file inline-supplementary-material-1.pdf]

**Supplementary File 1. Strategies to improve equitable, person-centred OA care by strategy level and source****Patient-level strategies**

“Patient-level strategies” are those *offered to persons with OA to improve knowledge, confidence, behaviour, OA symptoms, OA status, or quality of life.*

| Strategy |                                                                                                                                                                                                         | Source |            |          |               |       |
|----------|---------------------------------------------------------------------------------------------------------------------------------------------------------------------------------------------------------|--------|------------|----------|---------------|-------|
|          |                                                                                                                                                                                                         | Review | Guidelines | Policies | Professionals | Women |
| 1        | Involve interpreters (family or professional) to translate spoken language during healthcare appointments                                                                                               |        |            |          | X             | X     |
| 2        | Offer education sessions about OA and self-management to persons with OA (women-only, group, in-person and virtual, multiple languages, across Canada, free, at workplaces or community centres)        |        |            |          | X             | X     |
| 3        | Provide educational material about OA to persons with OA (brochures physicians can hand out, posters in community settings and online, in different languages, include culturally relevant information) | X      | X          | X        | X             | X     |
| 4        | Provide question prompt tools to persons with OA to help them prepare to ask questions, raise concerns, and offer information during healthcare appointments                                            |        |            |          | X             | X     |
| 5        | Consider patients’ cultural needs and economic circumstances when offering treatment, self-care advice and/or programs (e.g., language, cost of services such as physiotherapy)                         | X      |            |          | X             | X     |
| 6        | Healthcare professionals that first learn about patients’ OA concerns or symptoms should refer them for manual therapy (e.g., physiotherapy)                                                            |        |            |          | X             | X     |
| 7        | Have regular follow-up visits with patients to monitor progress (e.g., following self-management advice, symptom control)                                                                               |        |            |          |               | X     |
| 8        | Offer peer support groups for persons with OA to help with self-care (virtual and in-person, multiple languages)                                                                                        |        |            |          |               | X     |

**Clinician-level strategies**

“Clinician-level strategies” are those *offered to healthcare professionals to improve OA knowledge, confidence, behaviour, or skills.*

| Strategy |                                                                                                                                    | Source |            |          |               |       |
|----------|------------------------------------------------------------------------------------------------------------------------------------|--------|------------|----------|---------------|-------|
|          |                                                                                                                                    | Review | Guidelines | Policies | Professionals | Women |
| 9        | Provide medical school education and mandatory (i.e. required) continuing education about how to diagnose and manage OA            |        |            |          | X             | X     |
| 10       | Provide healthcare professionals with training on bias and cultural sensitivity                                                    |        |            | X        | X             | X     |
| 11       | Provide healthcare professionals with timely access to interpreters                                                                |        |            |          | X             | X     |
| 12       | Provide healthcare professionals with OA educational materials to give to patients                                                 |        |            |          | X             | X     |
| 13       | Provide healthcare professionals with information or tools to help them diagnose and treat OA in persons from disadvantaged groups |        | X          |          | X             |       |
| 14       | Ensure patient health records are linked so that all healthcare professionals have a full picture of patients’ health status       |        |            |          | X             |       |

**System-level strategies**

"System-level strategies" are those *developed and/or offered by health systems or government to improve access to OA care, advice and support.*

| Strategy |                                                                                                                                                                                          | Source |            |          |               |       |
|----------|------------------------------------------------------------------------------------------------------------------------------------------------------------------------------------------|--------|------------|----------|---------------|-------|
|          |                                                                                                                                                                                          | Review | Guidelines | Policies | Professionals | Women |
| 15       | Allow persons with OA to self-refer to clinics or self-management programs (e.g., patients do not need to rely on primary care provider for a referral)                                  |        |            |          | X             |       |
| 16       | Offer health promotion campaigns to the public on how to prevent and manage OA in a variety of formats and settings (e.g., social media, billboards)                                     |        |            |          | X             | X     |
| 17       | Expand the scope of practice of healthcare professionals (e.g. physiotherapists, occupational therapists, pharmacists) so that they can refer persons with OA for tests or services      |        |            |          | X             | X     |
| 18       | Increase diversity of healthcare professionals and policymakers (e.g., more ethnically diverse or women providers)                                                                       |        |            |          | X             | X     |
| 19       | Publicly fund services for OA management (e.g., ensure that provincial health insurance covers services like physiotherapy)                                                              |        |            |          | X             | X     |
| 20       | Offer a telephone support line that persons with OA can call for information about OA                                                                                                    |        |            |          | X             |       |
| 21       | Implement OA-specific clinics or centres (e.g., one-stop clinics where patients can access various healthcare professionals such as family physicians, physiotherapists, social workers) |        |            |          | X             | X     |
| 22       | Develop a Canadian OA strategy and clinical pathway (e.g., collaboration between governments and healthcare professionals to create policies and guidelines to improve OA care)          |        |            |          | X             |       |
| 23       | Develop public spaces in all communities that promote physical activity (e.g., bicycle/walking paths)                                                                                    |        |            |          | X             |       |
| 24       | Engage diverse women and other disadvantaged groups in planning OA policies, strategies and programs                                                                                     |        |            |          | X             |       |
| 25       | Implement primary care hubs in underserved areas for disadvantaged groups that include primary care physicians and nurses in community agencies                                          |        |            |          | X             |       |
| 26       | Collect and share data about the health experiences of disadvantaged groups (e.g., diverse women) to understand their specific healthcare needs and preferences                          |        |            |          | X             |       |
| 27       | Evaluate the equity of programs or policies in healthcare organizations using formal tools or frameworks                                                                                 |        |            | X        |               |       |
| 28       | Train lay health leaders or community health workers from disadvantaged communities to assist persons in their community with OA in self-management                                      |        |            | X        |               |       |
