# Supplementary material
Source: HighWire-hosted journal article supplement (https://bmjopen.bmj.com/content/14/2/e080301)
Supplement: inline-supplementary-material-2 [file inline-supplementary-material-2.pdf]

## Supplementary Appendix 2. Delphi results

### Patient-level strategies

| Item | Strategy                                                                                                                                                                                               | Suggested revision from Round One                                                                                                                                                                                                                           | Round 1 (rating)     | Round 2 (rating) | Decision |
|------|--------------------------------------------------------------------------------------------------------------------------------------------------------------------------------------------------------|-------------------------------------------------------------------------------------------------------------------------------------------------------------------------------------------------------------------------------------------------------------|----------------------|------------------|----------|
| 1    | Involve interpreters (family or professional) to translate spoken language during healthcare appointments                                                                                              | None                                                                                                                                                                                                                                                        | Retain (81.3%)       | ---              | Retain   |
| 2    | Offer education sessions about OA and self-management to persons with OA (women-only, group, in-person and virtual, multiple languages, across Canada, free, at workplaces or community centres)       | None                                                                                                                                                                                                                                                        | Retain (90.6%)       | ---              | Retain   |
| 3    | Provide educational material about OA to persons with OA (brochures physicians can hand out, posters in community settings and online, in multiple languages, include culturally relevant information) | None                                                                                                                                                                                                                                                        | Retain (90.6%)       | ---              | Retain   |
| 4    | Provide question prompt tools to persons with OA to help them prepare to ask questions, raise concerns, and offer information during healthcare appointments                                           | Provide question prompt tools (pre-formed list of questions considered important by diverse persons with OA) to persons with OA to help them prepare to ask questions, raise concerns, and offer information during healthcare appointments                 | No consensus (76.6%) | 79.6%            | Discard  |
| 5    | Consider patients' cultural needs and economic circumstances when offering treatment, self-care advice and/or programs (e.g., language, cost of services such as physiotherapy)                        | Consider patients' cultural needs and economic circumstances when offering treatment, self-care advice and/or programs (e.g., language, cost of services from physiotherapists, chiropractors, dieticians, etc.)                                            | Retain (93.8%)       | ---              | Retain   |
| 6    | Healthcare professionals that first learn about patients' OA concerns or symptoms should refer them for manual therapy (e.g., physiotherapy)                                                           | Healthcare professionals that first learn about patients' OA concerns or symptoms should refer them for services that include but are not restricted to manual therapy, exercise therapy or education, self-management programs, nutrition counseling, etc. | 50.00%               | 90.7%            | Retain   |

|   |                                                                                                                           |      |                |     |        |
|---|---------------------------------------------------------------------------------------------------------------------------|------|----------------|-----|--------|
| 7 | Have regular follow-up visits with patients to monitor progress (e.g., following self-management advice, symptom control) | None | Retain (81.3%) | --- | Retain |
| 8 | Offer peer support groups for persons with OA to help with self-care (virtual and in-person, multiple languages)          | None | Retain (81.1%) | --- | Retain |

**Clinician-level strategies**

| Item | Strategy                                                                                                                           | Suggested revision from Round One                                                                                                    | Round 1 (rating) | Round 2 (rating) | Decision |
|------|------------------------------------------------------------------------------------------------------------------------------------|--------------------------------------------------------------------------------------------------------------------------------------|------------------|------------------|----------|
| 9    | Provide medical school education and mandatory (i.e. required) continuing education about how to diagnose and manage OA            | Provide medical school education and mandatory (i.e. required) continuing education about how to diagnose and manage OA              | Retain (85.9%)   | ---              | Retain   |
| 10   | Provide healthcare professionals with training on bias and cultural sensitivity                                                    | None                                                                                                                                 | Retain (87.5%)   | ---              | Retain   |
| 11   | Provide healthcare professionals with timely access to interpreters                                                                | None                                                                                                                                 | Retain (87.5%)   | ---              | Retain   |
| 12   | Provide healthcare professionals with OA educational materials to give to patients                                                 | None                                                                                                                                 | Retain (92.2%)   | ---              | Retain   |
| 13   | Provide healthcare professionals with information or tools to help them diagnose and treat OA in persons from disadvantaged groups | None                                                                                                                                 | Retain (89.1%)   | ---              | Retain   |
| 14   | Ensure patient health records are linked so that all healthcare professionals have a full picture of patients' health status       | Ensure patient health records are linked so that all healthcare professionals have a full picture of patients' health status history | Retain (93.8%)   | ---              | Retain   |

**System-level strategies**

| Item | Strategy                                                                                                                                                | Suggested revision from Round One                                                              | Round 1 (rating) | Round 2 (rating) | Decision |
|------|---------------------------------------------------------------------------------------------------------------------------------------------------------|------------------------------------------------------------------------------------------------|------------------|------------------|----------|
| 15   | Allow persons with OA to self-refer to clinics or self-management programs (e.g., patients do not need to rely on primary care provider for a referral) | None                                                                                           | Retain (81.3%)   | ---              | Retain   |
| 16   |                                                                                                                                                         | Offer health promotion campaigns to the public on how to prevent and manage OA in a variety of |                  | 81.5%            | Retain   |

|    |                                                                                                                                                                                                        |                                                                                                                                                                                                                        |                      |       |         |
|----|--------------------------------------------------------------------------------------------------------------------------------------------------------------------------------------------------------|------------------------------------------------------------------------------------------------------------------------------------------------------------------------------------------------------------------------|----------------------|-------|---------|
|    | Offer health promotion campaigns to the public on how to prevent and manage OA in a variety of formats and settings (e.g., social media, billboards)                                                   | formats and settings including but not limited to social media, billboards, cultural media, shops, places of worship, etc.)                                                                                            | No consensus (79.7%) |       |         |
| 17 | Expand the scope of practice of healthcare professionals (e.g. physiotherapists, occupational therapists, pharmacists) so that they can refer persons with OA for tests or services                    | Expand the scope of practice of healthcare professionals such as physio- or occupational therapists, chiropractors, pharmacists, etc. along with training so that they can refer persons with OA for tests or services | No consensus (78.1%) | 75.9% | Discard |
| 18 | Increase diversity of healthcare professionals and policymakers (e.g., more ethnically diverse or women providers)                                                                                     | None                                                                                                                                                                                                                   | No consensus (78.1%) | 75.9% | Discard |
| 19 | Publicly fund services for OA management (e.g., ensure that provincial health insurance covers services like physiotherapy)                                                                            | Publicly fund services for OA management (e.g., ensure that provincial health insurance covers services from physiotherapists, chiropractors, dieticians, etc.)                                                        | Retain 85.9%         | ---   | Retain  |
| 20 | Offer a telephone support line that persons with OA can call for information about OA                                                                                                                  | None                                                                                                                                                                                                                   | No consensus (67.2%) | 67.3  | Discard |
| 21 | Implement OA-specific clinics or centres (e.g., one-stop clinics where patients can access various healthcare professionals (family physicians, physiotherapists, chiropractors, social workers, etc.) | Implement OA-specific clinics or centres (e.g., one-stop clinics where patients can access various healthcare professionals (family physicians, physiotherapists, chiropractors, social workers, etc.)                 | Retain (89.1%)       | ---   | Retain  |
| 22 | Develop a Canadian OA strategy and clinical pathway via collaboration of governments and healthcare professionals to improve OA care                                                                   | Engage diverse persons with OA, healthcare professionals to develop a Canadian OA strategy                                                                                                                             | Retain (89.1%)       | ---   | Retain  |
| 23 | Develop public spaces in all communities that promote physical activity (e.g., bicycle/walking paths)                                                                                                  | None                                                                                                                                                                                                                   | Retain (93.8%)       | ---   | Retain  |
| 24 | Engage diverse women and other disadvantaged groups in planning OA policies, strategies and programs                                                                                                   | None                                                                                                                                                                                                                   | No consensus (79.7%) | 87.0% | Retain  |
| 25 |                                                                                                                                                                                                        | None                                                                                                                                                                                                                   | Retain (84.4%)       | ---   | Retain  |

|    |                                                                                                                                                          |                                                                                                                                                                                                                                      |                      |       |        |
|----|----------------------------------------------------------------------------------------------------------------------------------------------------------|--------------------------------------------------------------------------------------------------------------------------------------------------------------------------------------------------------------------------------------|----------------------|-------|--------|
|    | Implement primary care hubs in underserved areas for disadvantaged groups that include primary care physicians and nurses in community agencies          |                                                                                                                                                                                                                                      |                      |       |        |
| 26 | Collect and share data about the health experiences of disadvantaged groups (e.g., diverse women) to understand their specific OA needs and preferences  | None                                                                                                                                                                                                                                 | Retain (84.4%)       | ---   | Retain |
| 27 | Evaluate the equity of OA programs or policies in healthcare organizations using formal tools or frameworks                                              | Evaluate the equity of OA programs or policies in healthcare organizations using existing tools (e.g. surveys, measures, instruments) that are designed to assess equity of access to and quality of care among disadvantaged groups | No consensus (78.1%) | 90.7% | Retain |
| 28 | Train lay health leaders or community health workers from disadvantaged communities to assist persons with OA in their community with OA self-management | None                                                                                                                                                                                                                                 | Retain (84.4%)       | ---   | Retain |

**Additional strategies**

Recommended by Round One respondents and rated only in Round Two

| Item | Strategy                                                                                                                                              | Suggested revision from Round One | Round 1 (rating) | Round 2 (rating) | Decision |
|------|-------------------------------------------------------------------------------------------------------------------------------------------------------|-----------------------------------|------------------|------------------|----------|
| 29   | Fund OA diagnosis and management (e.g. primary care, manual therapy, exercise therapy, self-management education, etc.) as part of home care services | ---                               | ---              | 81.5%            | Retain   |
| 30   | Advocate for and fund research on equitable access to and quality of OA care                                                                          | ---                               | ---              | 87.0%            | Retain   |
| 31   | Healthcare professionals should engage patients by inquiring about OA management needs and preferences                                                | ---                               | ---              | 98.1%            | Retain   |
